# Supplementary material for: Ultrasound-mediated delivery and distribution of polymeric nanoparticles in the normal brain parenchyma of a metastatic brain tumour model
Source: PLoS One. 2018 Jan 16;13(1):e0191102. doi: 10.1371/journal.pone.0191102 (PMC5770053; doi:10.1371/journal.pone.0191102)
Supplement: S2 File — The quantitative data presented in Figs 4–6 are given in the excel file. Fig 4. MRI intensity and NP uptake and displacement data for individual mice. Fig 5. ARF induced displacement of NPs from blood vessels in individual mice and up to 10 frozen tissue sections. Fig 6. P-gp expression given as % area covered by P-gp staining in ROIs in individual mice and individual tissue sections. (XLSX) [file pone.0191102.s005.xlsx]

## Sheet: Figure 4
Fig. 4e - Transport of NPs across the BBB	Ratio of MR intensities in treated vs untreated areas	Ratio of NPs in treated vs untreated areas	S.E.M.
	2.44262	7.71253	1.22465
	1.70789	0.919485	0.0994095
	1.88678	1.88681	0.309795
	1.4152	1.25918	0.254914
	1.89985	3.45645	0.261292
	1.55644	1.29686	0.116329
Fig. 4f - Displacement of NPs away from blood vessels	Ratio of MR intensities in treated vs untreated areas	Displacement Ratio of NPs in treated vs untreated areas	S.E.M.
	2.44262	2.29555	0.293676
	1.70789	1.11269	0.0533069
	1.88678	1.26801	0.15588
	1.89985	1.51274	0.0960614
	1.55644	1.244	0.29178

## Sheet: Fig 5 animal 1
NP displacement for each tissue section
	Control	Section 1	Section 2	Section 3	Section 4	Section 5	Section 6	Section 7	Section 8	Section 9	Section 10
	2.24148	2.82843	8.50163	3.38391	3.30503	2.23607	2.37212	2.12132	1.48813	2.23607	3
	3	3.34768	8.96635	3.39935	5.95479	2.23607	2.69072	3.16228	1.97016	2.62999	3.29487
	5.83095	5	10.4403	4.70156	13.029	2.23607	3.08114	4.50207	3.3541	2.69039	3.75766
	7	5	12.3693	5.58252	15.4632	2.53225	3.30253	4.63081	3.49335	4.03629	4.26117
	10.4842	5.51621	12.6738	5.87245	16.6433	5.16236	3.61803	5	4.0702	4.27733	5.80158
	11.1803	6.0208	13.4188	6.32456	20.8657	6.08276	5.83287	5.12132	4.28794	4.47214	6.12392
	11.6514	7.81025	14.7648	8.92251	22.2991	6.32582	6.61121	7.52525	4.47214	5.31717	7.02662
	12.8588	8.87194	14.994	9.43398	22.9837	6.59335	8.32166	8.06226	6.14023	5.63249	7.07107
	13.6349	8.95756	15.5321	12.5216	23.3077	6.67083	9.18505	8.759	7.81025	6.5	7.28011
	16.5605	8.99983	16.8671	14.1421	24.0416	6.93513	10.0334	9.26598	8.05443	6.51638	7.81758
	18.0653	11.2288	17.6084	15.2643	25.4951	7.41322	10.1129	9.55249	8.24621	6.9018	8.97214
	18.1464	11.4018	18.0278	18.0554	25.5539	8.06226	10.9006	11.291		7.51119	10.3421
	18.1633		18.7367		25.9615		12.1655	11.4018		7.83902	10.3852
	18.5607		20.0035		26.5707			12.9904		9.43398	11.7432
	18.7216		20.7703		27.0431	8.9035		13.0934		10.7703
					27.1948	9.05539				11.3358
					27.2029	9.5342
					28.1603	11.8234		13.9284
					28.178	12.0416		14.0089	8.544
					28.4605	12.6194		14.0159	8.58448
					28.7793	14.2717		14.3178	8.80116
					29.4703	14.3962		14.4222	10
		13.1244			29.8014	16.6208		14.8092	10.1033
		13.2388		20.4555	30.5941	16.8814		15.2643	10.2613
		13.3417		21.2705	30.8732	20.1826		15.2971	10.2774
		13.866		21.5407	32.1714	20.1897		16.1245	11.8158
		14.808		21.7776	32.9742	20.2237		16.5598	12.3111
		15.6724		21.9385	32.9848	20.4337		16.7362	16.1245
		17.0866		22.0227	33.6053	23.2976		17.0294	17.1172
		17.383		22.6163	34.0624	23.9189		17.2932	18.1477
		18.1927		23.473	35.0427	25.2175		17.4616	18.8599
		18.6044		23.6907	35.1283	27.4571		18.2846	18.868
		20.0031		27.3282	35.4654	30.2655		18.9585	20.2688
		20.8806	22.9323	27.425	35.4683	31.802	13.9643	21.0238	22.0971
		22	24.608	28.0179	35.805	33.541	15.2212	21.0297	26.3255
		22.4664	25.02	28.6466	36.7032	35.4181	15.3462	21.4709	26.9258
		24.0208	25.318	29.4109	37.3664	35.5538	16.7668	22.6274	27.0185	11.4051	12.0934
		24.6905	26.3059	30.5041	38.0657	35.6142	17.3135	22.8473	27.074	11.6619	13.1975
		27.6696	26.4764	31.0207	40.4784	37.0284	17.7375	24.0801	27.9686	12.3661	13.2338
		28.0575	26.528	31.5753	40.8719	37.4287	18	24.1372	34.6364	13.0657	14.8841
		28.374	27.1499	34.4201	42.8398	38.0789	19.7836	24.6179	35.4189	13.453	15.1909
		29.5993	27.4669	34.5539	43.4166	38.757	20.5244	25.02	37.9713	13.8689	15.809
		29.8179	27.8098	37.0404	43.4704	39.3894	23.0217	26.4476	41.1096	14.089	18.8114
	21.2132	32.249	30.0167	40.3113	43.605	40.3489	23.5538	26.7117	42.9772	14.3592	21.1922
	22.3156	32.4281	30.8707	40.6883	44.0454	41.4817	23.6299	28.4666	44.2028	15	22.6716
	22.3607	32.7452	32.0624	41.6548	44.3476	43.4166	26.0909	33.0892	46.9123	15.0151	25.6029
	25.6125	33.5675	33.0647	41.7253	45.5875	44.7715	30.5491	33.579	47.0293	15.5424	27.1031
	26.4625	34.3424	33.5	46.3927	47.5615	47.3031	31.305	34.4547	47.9094	16.8385	27.9795
	26.9331	36.0718	41.7732	46.848	48.9183	51.1957	31.3129	42.7321	48.2597	17.7485	33.1361
	27.1246	36.8917	43.051	47.9941	48.9388	55.1159	31.7233	43.9639	49.0918	19.1107	40.1928
	38.0132	39.7976	44.2041	49.9553	49.4865	55.1951	33.5145	44.9222	51.5485	19.3067	41.6151
	39.6761	46.849	46.7039	51.2675	50.1839	56.3637	35.2785	50.01	51.6298	25.0799	45.2865
	41.1576	47.5677	48.3836	51.4406	52.6304	57.7148	36.1722	56.8001	56.3164	28.2569	45.7687
	46.2385	49.6488	49.7198	56.0273	52.6582	65.1549	38.263	61.2699	57.9741	29.1125	53.0314
	46.9707	52.1376	52.0096	58.2613	54.7814	65.168	39.8529	61.7034	60.2458	30.0832	58.3943
	47.967	54.0833	52.8157	59.7316	59.6657	67.8029	41.0122	64.3506	60.4451	30.1496	58.8862
	50.3612	57.0789	56.7733	60.6383	63.1269	68.6586	50.3543	71.5242	61.4744	35.8284	62.502
	53.6704	62.514	68.7874	62.8172	72.9586	69.2694	52.9284	72.7634	69.956	55.3031	62.9095
	55.3624	74.6726	72.6662	63.0079	86.0015	80.4114	58.4209	75.06	75.452	57.5196	64.3354
	66.3193	74.8009	74.0841	69.7283	86.8559	84.4344	67.424	75.5522	76.9367	79.6006	71.8316
	69.8808	90.3861	77.4145	76.4235	92.477	89.3688	70.6134	94.8947	77.5242	82.5897	85.4927

## Sheet: Fig 5 animal 2
NP displacement for each tissue section
	Control	Section 1	Section 2	Section 3	Section 4	Section 5	Section 6	Section 7	Section 8	Section 9	Section 10
	3	3.24025	2.23607	2	3.5193	2.63872	4.8544	1.63804	2.23607	1.49768	2.23607
	3.16228	3.81834	3.16228	2.39017	3.9655	2.98565	5.30133	1.69591	3.14417	2.5	3.16228
	4	4.272	3.43497	3.39969	5.31801	4.12311	6.01377	3.6721	5.52268	3.60555	3.35903
	5.09902	5.14916	4.75158	6.04152	5.66228	5.83095	7.8491	5.73828	9.43398	4.76321	5.28119
	6.87184	5.63389	5.13437	6.07775	8.36998	5.91548	8.62568	6.5971	9.78694	8.14168	5.30446
	7.34286	5.70918	5.98017	6.15506	8.48528	6.08276	10.4796	7	9.98019	8.69763	6.36248
	9.84886	5.92005	19.1078	16.6423	9.74002	6.36887	12.4182	13.0925	10.5149	14.0357	6.56918
	10.8467	8.00767	22.6108	16.6778	10.3657	7.44699	22.8035	15.8885	11.4018	24.7386	6.82434
	12.4091	15.8114	29.0089	19.8494		7.45595	26.2361	16.8862	20.8439	62.6787	6.88337
	13.4716	22.6159	45.6292	23.3167		8.69354	27.2029		42.287	87.1181	7.4012
	15.0333	35.1887		62.9414		9.21954	49.3606		52.0352		15.2315
	25.1594					9.50439	68.5949		52.8616		74.5656
	28.1234					12.1655			55.7651
	47.0425					20.388
	80.5155					23.4094
						27.5718
						27.7672
						44.2816
						59.1238
						66.8613
						68.0661

## Sheet: Fig 5 animal 3
NP displacement for each tissue section
	Control	Section 1	Section 2	Section 3	Section 4	Section 5	Section 6	Section 7	Section 8	Section 9	Section 10
	0.91257	1.95892	2.54854	3.70927	2.23607	2.03078	3.12363	3.16228	2.69917	1
	2.53225	3.08114	4.35418	4.20155	2.39445	2.84583	5.17705	4.62132	3.16228	2
	3.04138	4.1888	4.68551	4.24847	2.86367	3.16228	5.41958	4.76385	3.60555	2.23607
	3.16228	4.53823	4.80045	5.31507	3.19185	4.00705	6.7082	6.36832	4.06155	2.55439
	3.53257	4.84125	6.49482	5.38516	4.30197	4.30412	6.76141	7.97759	4.75	3.16228
	3.60555	6	6.49699	5.77355	6.24474	4.35739	7.07107	8.76156	5.27994	3.74273
	4.7768	7.2111	8.12998	6.08276	6.3681	5.39792	7.07107	9.01388	5.45552	4.32156
	4.94954	8.48528	8.43221	6.7082	6.40312	5.55736	7.8169	10.198	5.71334	4.45192
	7.61577	9.19515	8.77238	7.23074	6.48605	5.83095	8.16083	10.6538	5.80977	4.47214
	7.69036	9.38788	8.84637	7.52914	6.7082	6.31295	8.83491	10.7005	6.25461	4.78294
	7.85133	9.39113	8.88096	7.61577	7.80754	6.32456	11.1803	10.7703	6.71034	5
	7.85797	10.2698	9.36298	8.06684	7.83902	9.21954	11.3333	11.7119	6.80233	5.65685
	8.49181	11.1803	10.4322			9.22494		12.2321	7.01783	5.68008
	8.63134	11.2361	11.0733					13.8454	7.94021	6.10328
			12.7311					13.98		6.40312
			13.0994					14.2881		8.1287
			14.041					17.1869
			14.287
	8.65654	11.5209	16.6131
	9.16637	11.8533	18.1461	8.24621
	9.56431	12.8019	18.211	8.33854
	10.4403	13.0384	18.829	8.8459
	10.7703	15.2643	19.9642	9.5342
	10.8371	17.1827	21.1171	9.84886	8.06226
	11.6297	17.4642	21.1325	10.7703	8.544
	14.0555	18.3662	21.2184	11.4291	8.84476		12.1655	18.3823
	14.3178	19.1479	22.3338	12.1655	10.0499		12.1655	18.6011
	14.6736	19.3223	23.0543	17.1043	10.6151	10.2956	13.0957	19.9388
	15.6525	19.6469	23.1862	18.0554	11.6619	11.0829	13.4371	20.5183
	16.2788	20.8626	23.6115	18.3609	12.1048	14.0359	13.5903	21.095		8.80547
	16.8504	27.4065	28.7666	20.0371	13.8708	14.7786	14.5475	21.2236		9.95416
	17.9036	29.2928	29.9331	21.7635	15.0333	15.0083	15.7107	26.3576	8.48528	11.4586
	18.6138	33.6817	29.9881	22	18.0278	15.5322	16.5519	28.3487	8.97381	12.8062
	25.7871	35.7509	31.817	22.1828	19.2977	15.7319	16.6063	29.0689	10.9669	13.8067
	31.3847	36.263	33.1673	23.6001	20.971	19.9183	18.8481	31.8159	12.4146	14.1421
	34.0588	54.055	34.2048	25.496	21.9823	20.7966	19.5784	32.8589	14.2215	15.3579
	39.7099	60.9262	35.4915	28	31.0588	26.4764	20.0506	42.7142	14.7801	15.5777
	40.0697	69.857	38.3003	38.5572	31.8972	27.9084	22.5056	43.9659	15.1327	16.9767
	47.8746	70.8308	41.7303	39.9249	33.3321	28.0788	34.0863	47.1901	19.7294	18.4618
	51.2746	72.1734	45.6345	51.221	36.5712	30.4255	38.1821	47.8017	20.9293	26.0671
	55.0196	72.3395	49.6036	63.4502	54.0066	40.4969	40.5435	48.3322	23.2594	29.7691
	56.5318	74.7078	56.7908	73.6919	94.0479	50.4356	63.002	55.9628	30.1691	38.3043
	93.9171	95.8541	61.2944	90.6581	98.213	55.6192	75.326	83.2059	65.8323	50.3552

## Sheet: Fig 5 animal 4
NP displacement for each tissue section
	Control	Section 1	Section 2	Section 3	Section 4	Section 5	Section 6	Section 7	Section 8
	2.53859	2.53225	1.80278	1.41421	3.12407	1.70711	2.23607	3.16228	3.53553
	2.79185	2.6782	2.76416	2.39681	3.27448	2.59272	3.25934	3.52605	4.24264
	2.82843	2.82843	3.38391	3.16228	3.60555	2.91548	3.76443	5.22209	5.09902
	3.16228	2.82843	3.71328	4.88527	5.26246	3.83655	4.24264	5.36826	5.66228
	4.47214	3.60555	4.82294	5.91548	6.278	4	4.71699	7.91206	5.83095
	4.47214	4.23829	5.41548	7.19761	6.77854	4.38753	4.78205	8.24621	6.08276
	5.08234	4.72191	6.29386	7.28227	9.56713	4.4916	5.4585	8.75618	6.71221
	5.37504	5.06699	6.7082	7.57806	10.5369	5	5.73396	9.21954	6.82151
	5.76897	5.09902	6.72186	10.1997	11.4419	5	6.8541	10.4403	7.10634
	6.01255	5.19258	6.94286	10.2506	11.4688	6.27737	8.544	10.571	7.14901
	6.07905	5.37024	7.65864	12.0416	11.8654	8.06226	8.83857	11.0454	8.4334
	6.4559	5.92801	8.06226	12.8071	12.0416	9.18389	8.99562	11.9476	9.48683
	6.7082	6.32456	8.06226	13.0957	13.6015	14.7464	9.85945	12.3794	10
	7.81025	6.65525	9.32676	13.4293	14.5774	18.3984		14.2127
	8.38457	7.61577	9.48683	13.6015	15.2479	19.0263		14.8661
	8.96421	7.6539	9.5342	14.1421	15.5081			15.0171
	8.97214	9.05539	10	14.1903	16
	8.99983	9.05539	11.3137		18.2376
	10.8169	9.4	11.6619		18.3848
	12.0416	10.0249	13		18.5522
	12.083	10.0778	13.0957
	12.8995	10.9892	13.7367
	13.2121		13.8769
	13.2528		14.1231
	14		14.1421				13.7015
			14.3462				13.8924
			15.4029				14.0038
		12.6916	15.6015				15.4353
		12.837	15.8114	14.8787	19.8905		15.7909	15.0879
		13.0192	16.1331	15.8114	19.9904		16.14	15.2971
		13.0957	17.3344	17.0074	21.4749		16.2512	15.7946
		13.6015	17.6186	17.0294	21.9146		16.7631	16.3783
	15.5305	14.1768	18.7349	19.1072	22.1472		18.0278	16.6433
	15.6525	14.7648	19.2354	19.6345	27.331		21.4725	17.6918	10.2986
	15.7319	15.2643	19.8579	22.2996	28.2843		23.0868	17.9793	10.7703
	15.9531	16.1245	19.9828	22.7754	28.3021	19.0817	23.255	18.2764	11.6619
	17.088	17.0294	20.449	22.8035	28.489	19.1242	25.4779	18.6786	11.7047
	17.1172	18.1177	20.6384	23.2269	32.9142	19.2637	25.807	19.7687	12.1243
	17.6918	18.2938	20.8087	24.2883	33.1142	19.8234	25.9422	19.9145	12.3693
	17.8257	18.4211	21.2655	24.7524	33.8378	21.3568	26.1749	21.4709	13.1267
	17.8885	18.4391	22.0423	25.5562	34.3037	22.0907	26.4008	21.5572	14.7111
	18.0278	18.4939	22.3607	27.1787	34.9861	22.1359	26.5927	22.8071	15.7145
	18.1864	19.347	23.7697	27.6134	35.0567	22.6512	27.2029	23.7697	18.2804
	18.2872	21.8149	25.4951	29.4109	35.2754	23.3595	28.7995	24.0104	18.7158
	19.0263	23.7592	26.1762	30.203	37.513	24.1351	29.8734	24.062	20
	19.4023	27.9739	27.074	34.2927	38.0526	24.3447	33.1304	24.3516	22.6264
	19.4165	28.5044	27.3062	34.4127	39.1507	24.7853	33.3654	25	24.4021
	20.6155	31.8689	28.1421	34.6771	40.8044	26.0858	34.9915	26.5726	25.2282
	22.8035	34.7321	28.192	38.8909	40.8881	26.5597	35.4605	26.7104	31.4506
	24.0624	37.389	30.0832	41.0427	47.464	28.4397	37.449	28.8747	34.5814
	25.3241	43.1045	31.6228	41.0488	49.0635	29.4109	37.5467	29.1376	35.4683
	27.2959	47.6635	32.3538	41.2141	49.197	37.6464	38.0526	29.5169	38.9585
	27.4591	50.3115	38.0434	42.6044	50.3289	45.5957	41.7614	29.6338	42.6659
	29.4279	53.8541	38.5868	45.066	53.2819	48.4997	42.0842	29.9988	43.0601
	33.9877	54.2071	39.5285	53.3554	56.0284	49.084	42.5545	30.0104	43.3899
	37.7465	54.4569	58.2795	58	58.1378	50.5039	44.0101	32.449	43.7209
	41.4938	59.1692	59.0487	59.1396	58.7782	51.2136	45.5467	36.132	45.4477
	47.2968	63.675	61.1784	60.7289	64.3179	53.5899	47.7432	39.2938	46.0977
	58.0086	65.7875	61.7978	64.803	68.0978	56.8595	66.4051	42.638	47.0239
	61.5995	70.5365	65.8138	74.7838	69.6203	60.3091	67.6683	56.5979	53.4813
	82.8284	72.5125	69.5701	77.6987	78.032	73.1198	69.4622	76.6709	59.4986

## Sheet: Fig 6 P-gp
			Treated		Control
	ROI	Animal	% P-gp area		% P-gp area
Tissue section
1	ROI 1	2 h animal 4	1.325		0.949
1	ROI 2	2 h animal 4	1.005		1.236
1	ROI 3	2 h animal 4	1.407		0.821
2	ROI 1	2 h animal 4	2.854		2.219
2	ROI 2	2 h animal 4	4.038		2.85
2	ROI 3	2 h animal 4	2.452		1.709
3	ROI 1	2 h animal 4	0.434		0.342
3	ROI 2	2 h animal 4	0.847		1.13
3	ROI 3	2 h animal 4	0.503		0.763		Ratio treated vs not treated
		sum all	1.65167		1.33544		0.808544
1	ROI 1	0 h animal 3	2.053		2.458
1	ROI 2	0 h animal 3	1.259		2.023
1	ROI 3	0 h animal 3	2.366		2.2
1	ROI 4	0 h animal 3	1.759		2.393
2	ROI 1	0 h animal 3	0.838		1.099
2	ROI 2	0 h animal 3	1.144		1.198
2	ROI 3	0 h animal 3	1.217		1.144
2	ROI 4	0 h animal 3	0.766		1.463
3	ROI 1	0 h animal 3	0.407		0.619
3	ROI 2	0 h animal 3	0.497		0.586
3	ROI 3	0 h animal 3	0.35		0.4
3	ROI 4	0 h animal 3	0.39		0.345		Ratio treated vs not treated
		sum all	1.08717		1.32733		0.819061
1	ROI 1	2 h animal 5	2.332		2.036
1	ROI 2	2 h animal 5	5.141		3.335
1	ROI 3	2 h animal 5	2.108		2.275
2	ROI 1	2 h animal 5	2.507		1.865
2	ROI 2	2 h animal 5	2.254		2.859
2	ROI 3	2 h animal 5	2.59		2.79
3	ROI 1	2 h animal 5	1.152		1.008
3	ROI 2	2 h animal 5	0.611		0.507
3	ROI 3	2 h animal 5	0.823		0.816		Ratio treated vs not treated
		sum all	2.16867		1.94344		1.11589
1	ROI 1	2 h animal 6	1.647		2.119
1	ROI 2	2 h animal 6	1.859		1.626
1	ROI 3	2 h animal 6	1.588		1.278
1	ROI 4	2 h animal 6	1.271		2.064
2	ROI 1	2 h animal 6	0.135		0.204
2	ROI 2	2 h animal 6	0.274		0.334
2	ROI 3	2 h animal 6	0.19		0.293
2	ROI 4	2 h animal 6	0.058		0.223
3	ROI 1	2 h animal 6	0.193		0.074
3	ROI 2	2 h animal 6	0.201		0.084
3	ROI 3	2 h animal 6	0.117		0.166
3	ROI 4	2 h animal 6	0.028		0.066		Ratio treated vs not treated
		sum all	0.630083		0.710917		0.886297
1	ROI 1	0 h animal 1	2.817		2.496
1	ROI 2	0 h animal 1	2.496		3.395
1	ROI 3	0 h animal 1	3.505		3.135
1	ROI 4	0 h animal 1	2.136		3.043		Ratio treated vs not treated
		sum all	10.954		12.069		0.907615
1	ROI 1	0 h animal 2	2.836		2.881
1	ROI 2	0 h animal 2	2.876		2.801
1	ROI 3	0 h animal 2	3.077		3.221
1	ROI 4	0 h animal 2	3.083		3.104		Ratio treated vs not treated
		sum all	11.872		12.007		0.988757
